# Supplementary material
Source: MDPI journal article supplement (https://www.mdpi.com/2077-0472/13/2/432)
Supplement: s1 [file s1]

**Table 1S.** Pearson's correlation coefficients of analysed parameters

[illegible]
